# Supplementary material
Source: publisher figshare collection journal article supplement (https://gsajournals.figshare.com/ndownloader/files/31315660)
Supplement: Supplementary file 1 [file 31315660]

## Sheet: Sheet1
Data type	Experimental species	Symbol/name used in publication	Source – public	Source – published	Source – unpublished	Identifiers	New reagent	Comments
Data type (mandatory) Duplicate rows as needed. Order is flexible, but row titles must be preserved.	Experimental species (mandatory, "NA" okay)	Symbol/name used in publication (mandatory)	Source – public [stock center; company, data repository] (one of D,E,F mandatory)	Source -- published [PMID or 'this paper'] (one of D,E,F mandatory)	Source – unpublished [description, incl. lab of origin] (one of D,E,F mandatory)	Identifiers [format as ID_source:identifier] Separate multiple entries with semi-colon, space	New reagent (mandatory for new entities) Description, progenitor(s)	Comments (optional) Genotypes, purpose of reagent, additional information
software, algorithm	NA	Xenbase		PMC6853059		RRID: SCR_003280
software, algorithm	NA	STAR		PMC4631051		RRID: SCR_005622
software, algorithm	NA	HISAT2		PMC4655817		RRID: SCR_015330
software, algorithm	NA	HTSeq		PMC4287950		RRID:SCR_005514
software, algorithm	NA	DESeq2		PMC4302049		RRID:SCR_015687
software, algorithm	NA	DEGreport	Bioconductor			RRID: SCR_018941; DOI: 10.18129/B9.bioc.DEGreport
software, algorithm	NA	GOseq		PMC2872874		RRID: SCR_017052
software, algorithm	NA	pheatmap	CRAN			RRID: SCR_016418
software, algorithm	NA	biomaRt		PMC3170168		RRID: SCR_002987
large-scale dataset	X. laevis	XENLA_9.2		PMC6853059		RRID: SCR_003280
large-scale dataset	M. musculus	Mouse RNA-seq time-series of the development of seven major organs		PMC6658352		PRJEB26869; E-MTAB-6798
large-scale dataset	M. musculus	GRCm38.p6		PMC6943047		GRCm38.p6
large-scale dataset	X. tropicalis; X. laevis	Matching of X. Tr 9.0 transcripts to human gene symbols.		PMC6038144		Data S7
